# Supplementary material for: Releasing Bioactive Compounds from Brown Seaweed with Novel Cold-Adapted Alginate Lyase and Alcalase
Source: MDPI journal article supplement (doi:10.3390/md21040208), 2023-03-27
Supplement: s1 [file s1]

# Supplementary Materials

## Releasing Bioactive Compounds from Brown Seaweed with Novel Cold-Adapted Alginate Lyase and Alcalase

Jun Jiang <sup>1</sup>, Zhengqiang Jiang <sup>1</sup>, Qiaojuan Yan <sup>2</sup>, Susu Han <sup>1</sup> and Shaoqing Yang <sup>1,\*</sup>

<sup>1</sup> College of Food Science and Nutritional Engineering, China Agricultural University, No.17 Qinghua East Road, Haidian District, Beijing 100083, China  
<sup>2</sup> Key Laboratory of Food Bioengineering (China National Light Industry), College of Engineering, China Agricultural University, No.17 Qinghua East Road, Haidian District, Beijing 100083, China  
\* Correspondence: ysq@cau.edu.cn.

Table S1. Substrate Specificity of VfAly7.

| Substrate       | Specific activity (U/mg) | Relative activity (%) |
|-----------------|--------------------------|-----------------------|
| sodium alginate | 71.5                     | 100%                  |
| poly MG         | 68.3                     | 96%                   |
| poly M          | 47.2                     | 66%                   |
| poly G          | 34.3                     | 48%                   |
| Chitin          | 0                        | 0                     |
| Agarose         | 0                        | 0                     |
| mannan          | 0                        | 0                     |
| CMC             | 0                        | 0                     |
| cellulose       | 0                        | 0                     |

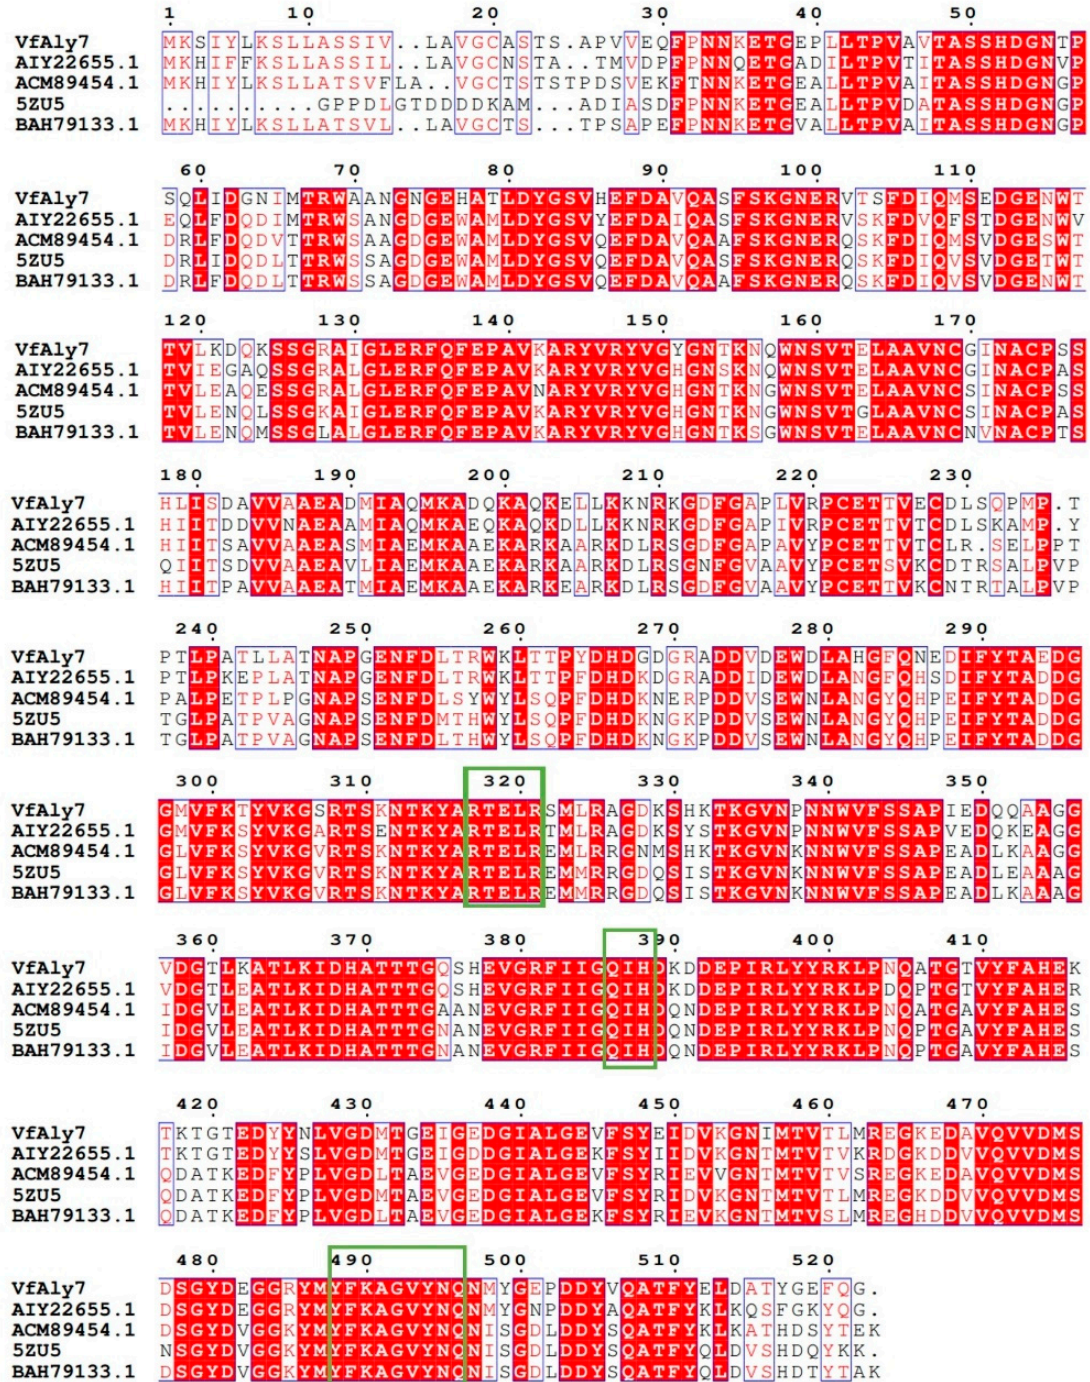

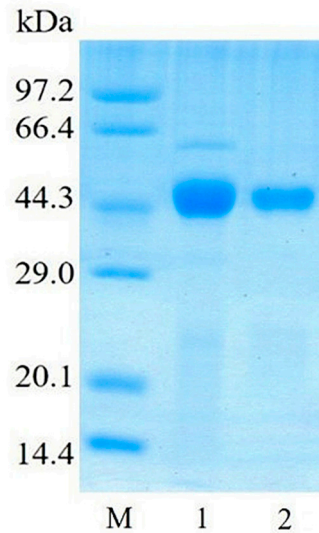

**Figure S2.** Purification of the recombinant VfAly7 expressed in *P. pastoris*. Lane M, low molecular weight protein standards; lane 1, crude enzyme; lane 2, purified VfAly7.

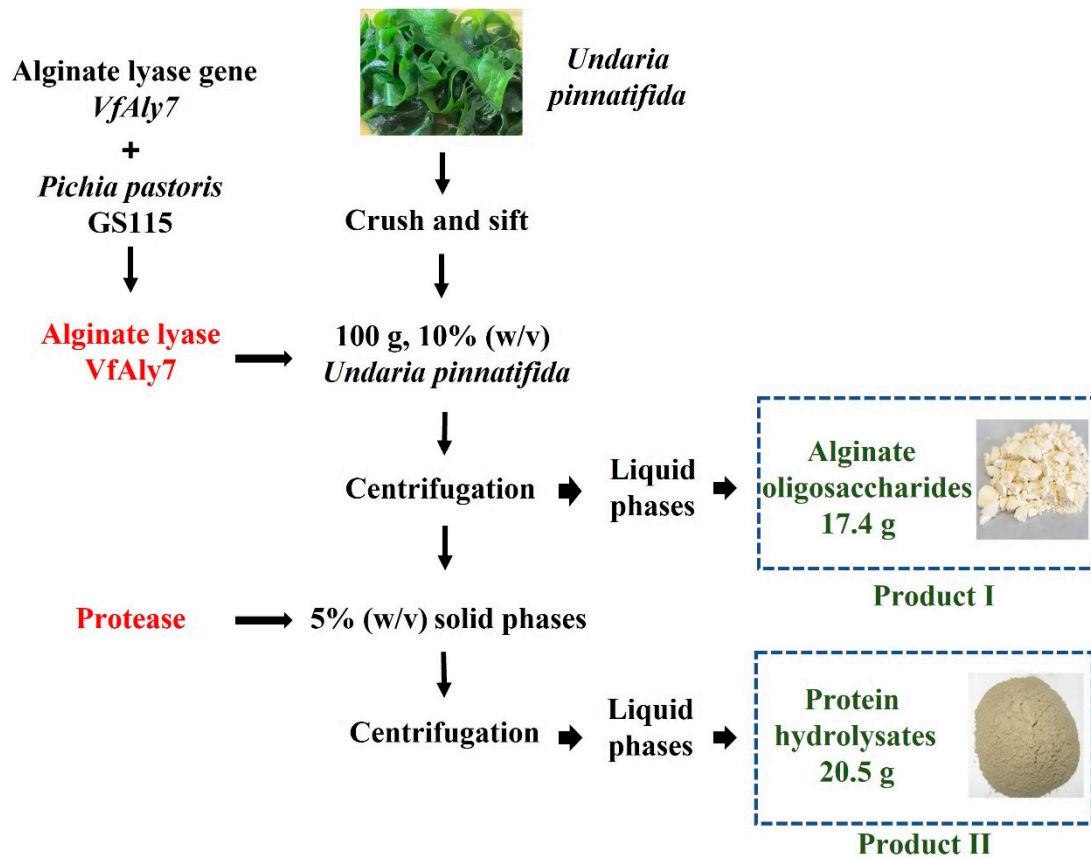

**Figure S3.** General scheme of the enzymatic approach for the utilization of brown seaweed (*Undaria pinnatifida*). The recoveries of alginates, proteins and minerals from brown seaweed (100 g) are indicated.
